# Supplementary material
Source: PubMed Central journal article supplement (PMC7543741)
Supplement: NIHMS1613055-supplement-1.pdf [file NIHMS1613055-supplement-1.pdf]

**eTable 1. Supportive kidney care knowledge, preference and video decision aid acceptability items**

1. Supportive kidney care involves: (please check all that apply)

\_\_\_ Continuing to work with your kidney doctor to manage symptoms of kidney disease

\_\_\_ Focusing on quality of life rather than procedures related to dialysis treatments

\_\_\_ Using medications and special diets to slow down kidney disease

\_\_\_ I don't know

2. If your chronic kidney disease worsens to complete kidney failure, what would your preference for treatment be?

a) I would prefer hemodialysis treatment

b) I would prefer peritoneal dialysis treatment

c) I would prefer supportive kidney care (or no dialysis treatment)

3. How helpful was the video in forming your preference?

a) The video was very helpful in forming my preference for treatment

b) The video was somewhat helpful in forming my preference for treatment

c) The video was a little helpful in forming my preference for treatment

d) The video was not helpful in forming my preference for treatment

4. How comfortable were you watching the video?

a) I was very comfortable watching this video

b) I was somewhat comfortable watching this video

c) I was a little comfortable watching this video

d) I was not comfortable watching this video

5. How satisfied were you with this video?

a) I was very satisfied with this video

b) I was somewhat satisfied with this video

c) I was a little satisfied with this video

d) I was not satisfied with this video

6. Would you recommend the video to other people who are thinking of making similar decisions?

a) I would definitely recommend this video to others

- b) I would probably recommend the video to others
- c) I would probably not recommend this video to others
- d) I would definitely not recommend this video to others

**eTable 2. Video satisfaction and acceptability (n=50)**

|                                | <b>Very</b>       | <b>Somewhat</b> | <b>A little</b>     | <b>Not</b>            |
|--------------------------------|-------------------|-----------------|---------------------|-----------------------|
| <b>Helpful (%)</b>             | 66                | 22              | 8                   | 4                     |
| <b>Felt comfortable (%)</b>    | 66                | 26              | 4                   | 4                     |
| <b>Felt satisfied (%)</b>      | 68                | 28              | 2                   | 2                     |
|                                | <b>Definitely</b> | <b>Probably</b> | <b>Probably not</b> | <b>Definitely not</b> |
| <b>Recommend to others (%)</b> | 72                | 24              | 4                   | -                     |
